# Supplementary material for: CALQ: compression of quality values of aligned sequencing data
Source: Oxford University Press journal article supplement (doi:10.1093/bioinformatics/btx737), 2017-11-22
Supplement: bioinformatics_34_10_1650_s1.pdf [file bioinformatics_34_10_1650_s1.pdf]

# CALQ: compression of quality values of aligned sequencing data

## Supplementary Data

Jan Voges, Jörn Ostermann and Mikel Hernaez

### Contents

|          |                                                      |           |
|----------|------------------------------------------------------|-----------|
| <b>1</b> | <b>Tools</b>                                         | <b>2</b>  |
| 1.1      | bgzip . . . . .                                      | 2         |
| 1.2      | CALQ . . . . .                                       | 2         |
| 1.3      | Crumble . . . . .                                    | 3         |
| 1.4      | DSRC . . . . .                                       | 4         |
| 1.5      | P-/R-Block . . . . .                                 | 5         |
| 1.6      | Quartz . . . . .                                     | 6         |
| 1.7      | QVZ 2 . . . . .                                      | 6         |
| <b>2</b> | <b>Datasets</b>                                      | <b>7</b>  |
| <b>3</b> | <b>Performance measurements</b>                      | <b>7</b>  |
| <b>4</b> | <b>Variant calling pipelines</b>                     | <b>11</b> |
| 4.1      | Alignment and preprocessing . . . . .                | 12        |
| 4.1.1    | Alignment with Bowtie 2 . . . . .                    | 12        |
| 4.1.2    | Sorting and indexing . . . . .                       | 12        |
| 4.1.3    | Duplicate marking . . . . .                          | 12        |
| 4.1.4    | Indel realignment . . . . .                          | 13        |
| 4.1.5    | Base quality score recalibration (BQSR) . . . . .    | 13        |
| 4.2      | Variant calling . . . . .                            | 13        |
| 4.2.1    | SNP calling with GATK . . . . .                      | 13        |
| 4.2.1.1  | Variant quality score recalibration (VQSR) . . . . . | 14        |
| 4.2.1.2  | Hard filtration . . . . .                            | 14        |
| 4.2.2    | SNP calling with Platypus . . . . .                  | 15        |
| 4.3      | Benchmarking tools . . . . .                         | 15        |
| <b>5</b> | <b>Variant calling results</b>                       | <b>16</b> |
| 5.1      | GATK + VQSR pipeline . . . . .                       | 17        |
| 5.2      | GATK + hard filtration pipeline . . . . .            | 23        |
| 5.3      | Platypus pipeline . . . . .                          | 24        |

# 1 Tools

Table 1 lists the tools, including CALQ, that were selected for the evaluation in this work.

Table 1: Tools selected for the evaluation.

| Tool name          | Version | Mode       | Lossless (Y/N) | Lossy (Y/N) |
|--------------------|---------|------------|----------------|-------------|
| bgzip              | 1.3     | default    | Y              | N           |
| CALQ               | 0b74e3d | default    | N              | Y           |
| Crumble (+ CRAM)   | 0.5     | -1<br>-9   | N<br>N         | Y<br>Y      |
| DSRC IL8B (+ gzip) | 2       | default    | N              | Y           |
| P-Block            | da36a12 | p=1<br>p=4 | N<br>N         | Y<br>Y      |
| Quartz (+ bzip2)   | 0.2.2   | default    | N              | Y           |
| QVZ 2              | d5383c6 | T1         | N              | Y           |
|                    |         | T2         | N              | Y           |
|                    |         | T4         | N              | Y           |
|                    |         | T8         | N              | Y           |
|                    |         | T16        | N              | Y           |
| R-Block            | da36a12 | r=5        | N              | Y           |
|                    |         | r=20       | N              | Y           |

## 1.1 bgzip

Bgzip is part of the HTSlib repository, which in turn is part of the SAMtools program suite. HTSlib 1.3 was downloaded from <http://www.htslib.org/>. The extraction of the quality values of a SAM file `file.sam` was performed with the following command.

---

```
$ python xtract_part_sam.py file.sam 10 1> file.sam.qual
```

---

Subsequently, the compression of the quality values with bgzip was performed with the following command.

---

```
$ bgzip -c file.sam.qual 1> file.sam.qual.bgz
```

---

The size of the compressed quality values was determined with the following command.

---

```
$ wc -c file.sam.qual.bgz
```

---

## 1.2 CALQ

CALQ can be downloaded from <https://github.com/voges/calq>. Build and usage information is available on the respective website.

CALQ processes the input data in fixed-size blocks, where each block contains  $b$  sequence alignments. We empirically derived a suitable block size using dataset B16 from Table 2. Figure 1 shows the CALQ compression ratio in bits per quality value versus the block size in number of sequence alignments for this dataset. As seen in the figure, the compression ratio asymptotically approaches a limit at around 0.29 bits per quality value. With CALQ, we want to give the user the opportunity to quickly perform selective access on the compressed data. Therefore, we chose a block size of  $b = 10,000$  sequence alignments for our further experiments.

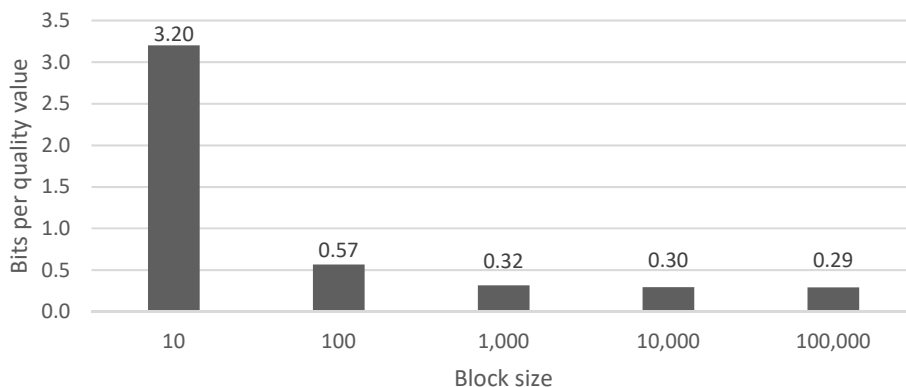

Figure 1: Bits per quality value versus block size in number of sequence alignments.

The following command was used to perform compression of the quality values in a SAM file `file.sam` with CALQ. The string given to the argument `-q` indicates the quality value type (i.e., quality value range) to be assumed by CALQ. Furthermore, the argument `-p2` conveys to the CALQ encoder the information that the sequenced organism possesses a diploid chromosome set. Finally, with `-b10000`, the CALQ encoder is instructed to process the input data in blocks which may contain at most 10,000 sequence alignments. The compressed quality value information is stored in the output file `file.sam.cq`.

---

```
$ calq -q Illumina-1.8+ -p 2 -b 10000 file.sam -o file.sam.cq
```

---

The following command was used to perform the decompression of the compressed quality values stored in the file `file.sam.cq`. To perform the decompression procedure, the CALQ decoder requires the alignment information, namely the mapping positions (POS), the CIGAR strings, and the reference sequence name(s) (RNAME). We pass this information to the CALQ decoder with the argument `-sfile.sam`. The reconstructed quality values are stored in the output file `file.sam.cq.qual`.

---

```
$ calq -d -s file.sam file.sam.cq -o file.sam.cq.qual
```

---

Finally, a SAM file containing the reconstructed quality values was produced with the following command.

---

```
$ python replace_qual_sam.py file.sam file.sam.cq.qual
```

---

The CALQ codec structure is shown in Figure 2.

### 1.3 Crumble

Crumble 0.5 was downloaded from <https://github.com/jkbonfield/crumble>. BAM-to-BAM compression of a BAM file `file.bam` with Crumble for the two compression levels `-1` and `-9` was performed with the following commands.

---

```
$ crumble -v -1 file.bam file.bam.crumble-1.bam
$ crumble -v -9 file.bam file.bam.crumble-9.bam
```

---

Subsequently, the resulting BAM files, which contain the modified quality values, were compressed with Scramble 1.14.6 [Bon14] using the following commands. Scramble was downloaded from [https://github.com/jkbonfield/io\\_lib](https://github.com/jkbonfield/io_lib).

---

```
$ scramble -r ref.fa file.bam.crumble-1.bam file.bam.crumble-1.bam.cram
$ scramble -r ref.fa file.bam.crumble-9.bam file.bam.crumble-9.bam.cram
```

---

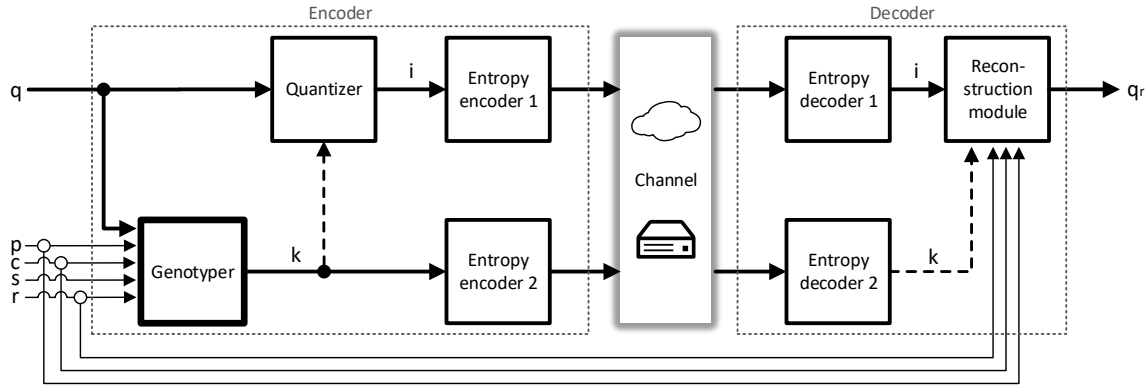

### Legend

|                                 |                         |                          |
|---------------------------------|-------------------------|--------------------------|
| q quality values                | p mapping positions     | —→ signal                |
| qr reconstructed quality values | c CIGAR strings         | - - - - → control signal |
| k quantizer indexes             | s donor sequences       | — → side signal          |
| i quantization indexes          | r reference sequence(s) |                          |

Figure 2: CALQ codec structure. The encoder gets as input quality values  $q$ , mapping positions  $p$ , CIGAR strings  $c$ , nucleotide sequences  $s$ , and optionally the reference sequence(s)  $r$ . The computation of the index  $k$  (as a function of the “genotype uncertainty”) is performed by the Genotyper block. The Quantizer block uses then the index  $k$  to select a specific quantizer from a previously computed set of quantizers, which transforms the input quality values into quantization indexes  $i$ . Both indexes  $k$  and  $i$  are encoded by the two entropy encoder blocks, respectively. For decompression, first, indexes  $k$  and indexes  $i$  are decompressed. Then, after the alignment information, i.e., the mapping positions, the CIGAR strings, and the reference sequence name(s), has been transmitted as side information to the decoder, the reconstruction module reconstructs the quality values  $q_r$ .

The compressed size of the quality values in the resulting CRAM files was determined using the tool `cram_size` which is included in the Scramble package.

---

```
$ cram_size file.bam.crumble-1.bam.cram
$ cram_size file.bam.crumble-9.bam.cram
```

---

`Cram_size` outputs the sizes of numerous data classes contained in a CRAM file. The data class named “QS” corresponds to the compressed size of the quality values.

## 1.4 DSRC

We used DSRC [DG11, RD14] to mimic the 8-level mapping introduced by Illumina. The specific mapping performed by DSRC may differ slightly from the actual Illumina binning, as the latter might depend on the sequencing machine.

DSRC was downloaded from <https://github.com/refresh-bio/DSRC>. The compression of quality values in a FASTQ file `file.fastq` was performed with the following command.

---

```
$ dsrc c -d3 -q2 -b256 -l file.fastq file.fastq.dsrc
```

---

The argument `c` invokes the compression mode. The argument `-d3` denotes the usage of the best DNA compression mode (not in the scope of this manuscript). The argument `-q2` denotes the best quality compression mode. The argument `-b256` tells DSRC to use the (best) FASTQ input buffer size in MB. The argument `-l` finally invokes the lossy quality value compression mode (i.e., the Illumina binning scheme).

The decompression of the DSRC bitstream was performed with the following command.

---

```
$ dsrc d file.fastq.dsrc file.fastq.dsrc.fastq
```

---

Subsequently, the modified quality values were extracted from the file `file.fastq.dsrc.fastq` with the following command.

---

```
$ python xtract_part_fastq.py file.fastq.dsrc.fastq 3 1> file.fastq.dsrc.fastq.qual
```

---

Finally, the modified quality values were compressed using `gzip`, as recommended by the DSRC authors using the following command.

---

```
$ gzip -9 -c file.fastq.dsrc.fastq.qual > file.fastq.dsrc.fastq.qual.gz
```

---

The size of the modified and compressed quality values was determined with the following command.

---

```
$ wc -c file.fastq.dsrc.fastq.qual.gz
```

---

## 1.5 P-/R-Block

The P- and R-Block algorithms [CMT14] represent quality values by separating them into blocks of variable size, where all quality values contained in each block do not violate a given distortion constraint. For each block, its length and the representative value is losslessly compressed and stored.

Let  $Q_{\max}$  and  $Q_{\min}$  denote the largest and the smallest quality values within a block, respectively. In P-Block, all quality values in a block should then satisfy  $Q_{\max} - Q_{\min} \leq 2p$ , where  $p$  is a user-specified parameter. In R-Block, the quality values are subject to the constraint  $Q_{\max}/Q_{\min} \leq r^2$ , with  $r$  being a user-specified parameter.

Whereas in P-Block the maximum absolute distance allowed between a quality value and its representative value is constant for every quality value, this distance in general is smaller for low quality values in R-Block. Hence, R-Block preserves low quality values more precisely than high ones.

P- and R-Block were downloaded from <https://github.com/rcanovas/libCSAM> (Git commit hash: da36a12).

The following command was used to compress the quality values in a SAM file `file.sam` with P-Block.

---

```
$ CompressQual file.sam -q 1 -m 1 -l $p
```

---

The authors of P- and R-Block tested the P-Block algorithm with the user-defined parameter  $p \in \{1, 2, 4, 8, 16, 32\}$ . To limit the amount of simulations, we used P-Block with the parameter  $p \in \{1, 4\}$ .

The following command was used to compress the quality values in a SAM file `file.sam` with R-Block.

---

```
$ CompressQual file.sam -q 2 -m 1 -l $r
```

---

The authors of P- and R-Block tested the R-Block algorithm with the user-defined parameter  $r \in 1 + \{0.05, 0.1, 0.2, 0.4, 0.8, 1.6, 3.2, 6.4\}$  (which corresponds to the command line parameters `r={5, 10, 20, 40, 80, 160, 320, 640}`). To limit the amount of simulations, we used R-Block with the parameter  $r \in 1 + \{0.05, 0.2\}$ .

Both commands above produce a bitstream file named `file.sam.cqual`. The decompression was performed with the following command.

---

```
$ DecompressQual file.sam.cqual
```

---

This produces the file `file.sam.cqual.qual` containing the reconstructed quality values.

## 1.6 Quartz

A necessary pre-processing step for the working of Quartz is the generation of a dictionary of common k-mers for each species. Then, for a given set of sequence reads, Quartz breaks these reads up into a set of overlapping so-called supporting k-mers.

Subsequently, every position in a supporting k-mer different from a dictionary k-mer is annotated as a possible variant. Quartz assumes that these divergent bases in supporting k-mers correspond to sequencing errors or single nucleotide polymorphisms (SNPs), respectively. The corresponding quality values are preserved by Quartz, whereas other quality values are set to a pre-defined default value.

Quartz 0.2.2 [YYPB15] was downloaded from <https://github.com/yunwilliamyu/quartz>. For the working of Quartz, a sequence dictionary is necessary. The sequence dictionary `dec200.bin.sorted` used in this work was downloaded from <http://giant.csail.mit.edu/quartz/dec200.bin.sorted.gz>. The modification of quality values of a FASTQ file `reads.fastq` with Quartz and the extraction of the quality values were then performed with the following two commands.

---

```
$ quartz dec200.bin.sorted "quartz" 8 0 reads.fastq
$ python xtract_qual_fastq.py reads.fastq.filtered_quartz \
  2> reads.fastq.filtered_quartz.qual
```

---

As recommended by the Quartz authors, we subsequently applied bzip2 compression on the modified quality values with the following command.

---

```
$ bzip2 reads.fastq.filtered_quartz.qual
```

---

The size of the compressed quality values was determined with the following command.

---

```
$ wc -c reads.fastq.filtered_quartz.qual.bz2
```

---

## 1.7 QVZ 2

QVZ 2 [HOW16] models the quality value sequence from each read as a Markov chain of order one, based on the observation that quality values are highly correlated with their neighbours. The transition probabilities are derived from the entire dataset to be compressed. Subsequently, these transition probabilities are used to compute a set of Lloyd-Max quantizers, indexed by the position within a read and the previously quantized value. Finally, an adaptive arithmetic encoder is used to compress the quantized quality values.

QVZ 2 was downloaded from <https://github.com/mikelhernaez/qvz2>. Compression of quality values of a SAM file `file.sam` with QVZ 2 was performed with the following two commands. We performed compression for the targeted mean squared error (MSE) distortions  $T \in \{1, 2, 4, 8, 16\}$ .

---

```
$ python xtract_qual_sam.py file.sam 2> file.sam.qual
$ qvz2 -t $T -v -u file.sam.qvz2.qual \
  file.sam.qual file.sam.qual.qvz2
$ python replace_qual_sam.py file.sam file.sam.qvz2.qual
```

---

The size of the compressed quality values was determined with the following command.

---

```
$ wc -c file.sam.qual.qvz2
```

---

## 2 Datasets

To evaluate the performance of the chosen compression tools, we used data from the “Updated database for Evaluation of Genomic Information Compression and Storage” [Joi16b] compiled by the Joint Ad-hoc Group on Genomic Information Compression and Storage (JAhG) between ISO/IEC JTC 1/SC 29/WG 11, also known as Moving Picture Experts Group (MPEG), and ISO/TC 276/WG 5. The selected datasets are shown in Table 2. For the dataset H01 we selected the first pair of FASTQ files, namely `ERR174324_1.fastq` and `ERR174324_2.fastq`.

Table 2: Datasets selected for the evaluation.

| ID  | Name             | Species         | Sequencing technology | Coverage |
|-----|------------------|-----------------|-----------------------|----------|
| H01 | ERR174324        | H. sapiens      | Illumina HiSeq 2000   | 14×      |
| H11 | SRR1238539       | H. sapiens      | Ion Torrent           | 10×      |
| H12 | Garvan replicate | H. sapiens      | Illumina HiSeq X      | 49×      |
| B16 | DH10B            | E. coli         | Illumina              | 422×     |
| I19 | dm3              | D. melanogaster | PacBio                | 100×     |

The data were downloaded from the following locations.

- H01: <http://www.ebi.ac.uk/ena/data/view/ERP001775/>
- H11: [ftp://ftp.ddbj.nig.ac.jp/ddbj\\_database/dra/fastq/SRA096/SRA096885/SRX517292/SRR1238539.fastq.bz2](ftp://ftp.ddbj.nig.ac.jp/ddbj_database/dra/fastq/SRA096/SRA096885/SRX517292/SRR1238539.fastq.bz2)
- H12, file 1: [https://s3-ap-southeast-2.amazonaws.com/kccg-x10-truseq-nano-v2.5-na12878/NA12878\\_V2.5\\_Robot\\_2\\_R1.fastq.gz](https://s3-ap-southeast-2.amazonaws.com/kccg-x10-truseq-nano-v2.5-na12878/NA12878_V2.5_Robot_2_R1.fastq.gz)
- H12, file 2: [https://s3-ap-southeast-2.amazonaws.com/kccg-x10-truseq-nano-v2.5-na12878/NA12878\\_V2.5\\_Robot\\_2\\_R2.fastq.gz](https://s3-ap-southeast-2.amazonaws.com/kccg-x10-truseq-nano-v2.5-na12878/NA12878_V2.5_Robot_2_R2.fastq.gz)
- B16: [ftp://webdata:webdata@usss-ftp.illumina.com/Data/SequencingRuns/DH10B/MiSeq\\_Ecoli\\_DH10B\\_110721\\_PF.bam](ftp://webdata:webdata@usss-ftp.illumina.com/Data/SequencingRuns/DH10B/MiSeq_Ecoli_DH10B_110721_PF.bam)
- I19: <http://bergmanlab.ls.manchester.ac.uk/data/tracks/dm3/dm3PacBio.bam>

## 3 Performance measurements

We measured the execution time and the maximum memory usage of each tool with GNU time 1.7. For example, to measure the performance of the CALQ encoder, we used the following command.

---

```
$ time -v -o file.sam.cq.time calq file.sam
```

---

The complete performance results for all tools and datasets are shown in Figure 3.

| H01 (ERR174324)      |                        |       |        |               |                        |       |               |       |                        |       |        |       | Platform |
|----------------------|------------------------|-------|--------|---------------|------------------------|-------|---------------|-------|------------------------|-------|--------|-------|----------|
|                      | Chromosome 3           |       |        | Chromosome 11 |                        |       | Chromosome 20 |       |                        | User  | System | Total |          |
|                      | Peak memory usage [kB] | User  | System | Total         | Peak memory usage [kB] | User  | System        | Total | Peak memory usage [kB] |       |        |       |          |
| CALQ encoder         | 86,712                 | 4,622 | 153    | 4,775         | 87,556                 | 3,241 | 114           | 3,355 | 89,056                 | 1,432 | 21     | 1,453 |          |
| CALQ decoder         | 19,164                 | 738   | 8      | 746           | 19,228                 | 510   | 6             | 516   | 19,728                 | 221   | 3      | 224   |          |
| Crumble -1           | 12,180                 | 1,022 | 13     | 1,035         | 40,468                 | 976   | 8             | 984   | 8,888                  | 359   | 3      | 362   |          |
| Crumble -9           | 12,248                 | 833   | 12     | 845           | 40,436                 | 697   | 4             | 701   | 9,044                  | 289   | 3      | 292   |          |
| DSRC IL8B            | N/A                    | N/A   | N/A    | N/A           | N/A                    | N/A   | N/A           | N/A   | N/A                    | N/A   | N/A    | N/A   |          |
| P-Block p=1 encoder  | 844,108                | 172   | 7      | 179           | 844,392                | 120   | 5             | 125   | 843,352                | 53    | 2      | 55    |          |
| P-Block p=1 decoder  | 791,732                | 30    | 2      | 32            | 790,320                | 24    | 2             | 26    | 740,116                | 10    | 1      | 11    |          |
| P-Block p=4 encoder  | 842,724                | 148   | 7      | 155           | 691,620                | 103   | 4             | 107   | 495,756                | 46    | 2      | 48    |          |
| P-Block p=4 decoder  | 708,804                | 14    | 2      | 16            | 657,020                | 10    | 2             | 12    | 588,068                | 5     | 1      | 6     |          |
| Quartz               | 26,538,340             | 1,283 | 346    | 1,629         | 26,538,160             | 1,118 | 261           | 1,379 | 26,538,160             | 456   | 238    | 694   |          |
| QVZ 2 T1             | 3,587,320              | 353   | 12     | 365           | 2,449,272              | 272   | 6             | 278   | 1,101,860              | 126   | 1      | 127   |          |
| QVZ 2 T2             | 3,586,944              | 310   | 7      | 317           | 2,448,808              | 237   | 3             | 240   | 1,101,696              | 110   | 1      | 111   |          |
| QVZ 2 T4             | 3,586,688              | 279   | 7      | 286           | 2,448,712              | 223   | 6             | 229   | 1,101,328              | 96    | 1      | 97    |          |
| QVZ 2 T8             | 3,582,736              | 267   | 10     | 277           | 2,442,668              | 186   | 2             | 188   | 1,091,048              | 89    | 1      | 90    |          |
| QVZ 2 T16            | 3,574,388              | 239   | 10     | 249           | 2,437,072              | 183   | 2             | 185   | 1,086,996              | 83    | 1      | 84    |          |
| R-Block r=5 encoder  | 790,360                | 182   | 9      | 191           | 790,464                | 131   | 7             | 138   | 790,648                | 60    | 4      | 64    |          |
| R-Block r=5 decoder  | 790,136                | 30    | 3      | 33            | 790,284                | 23    | 2             | 25    | 740,464                | 11    | 1      | 12    |          |
| R-Block r=20 encoder | 707,356                | 154   | 7      | 161           | 581,228                | 106   | 5             | 111   | 414,892                | 49    | 3      | 52    |          |
| R-Block r=20 decoder | 675,784                | 12    | 2      | 14            | 633,444                | 8     | 2             | 10    | 577,044                | 4     | 2      | 6     |          |

Intel Xeon E5-2680 v3 CPU (2.50 GHz); 270 GB RAM

| H11 (SRR1238539)     |                        |       |        |               |                        |       |               |       |                        |       |        |       | Platform |
|----------------------|------------------------|-------|--------|---------------|------------------------|-------|---------------|-------|------------------------|-------|--------|-------|----------|
|                      | Chromosome 3           |       |        | Chromosome 11 |                        |       | Chromosome 20 |       |                        | User  | System | Total |          |
|                      | Peak memory usage [kB] | User  | System | Total         | Peak memory usage [kB] | User  | System        | Total | Peak memory usage [kB] |       |        |       |          |
| CALQ encoder         | 91,652                 | 3,947 | 12     | 3,959         | 94,220                 | 2,386 | 161           | 2,547 | 93,180                 | 1,062 | 49     | 1,111 |          |
| CALQ decoder         | 20,928                 | 548   | 5      | 553           | 21,484                 | 346   | 4             | 350   | 21,776                 | 156   | 2      | 158   |          |
| Crumble -1           | 11,528                 | 3,488 | 7      | 3,495         | 56,400                 | 3,078 | 9             | 3,087 | 5,944                  | 1,282 | 3      | 1,285 |          |
| Crumble -9           | 11,460                 | 1,167 | 6      | 1,173         | 56,240                 | 916   | 5             | 921   | 6,076                  | 414   | 2      | 416   |          |
| DSRC IL8B            | N/A                    | N/A   | N/A    | N/A           | N/A                    | N/A   | N/A           | N/A   | N/A                    | N/A   | N/A    | N/A   |          |
| P-Block p=1 encoder  | 843,728                | 131   | 7      | 138           | 843,480                | 89    | 5             | 94    | 843,700                | 38    | 2      | 40    |          |
| P-Block p=1 decoder  | 790,772                | 29    | 3      | 32            | 790,224                | 21    | 2             | 23    | 791,064                | 9     | 1      | 10    |          |
| P-Block p=4 encoder  | 844,360                | 98    | 6      | 104           | 842,780                | 66    | 3             | 69    | 634,620                | 30    | 2      | 32    |          |
| P-Block p=4 decoder  | 790,208                | 13    | 2      | 15            | 772,776                | 10    | 2             | 12    | 637,460                | 5     | 2      | 7     |          |
| Quartz               | 26,538,336             | 1,490 | 400    | 1,890         | 26,538,248             | 618   | 244           | 862   | 26,538,128             | 260   | 190    | 450   |          |
| QVZ 2 T1             | 2,358,532              | 481   | 26     | 507           | 1,614,640              | 312   | 3             | 315   | 747,868                | 254   | 2      | 256   |          |
| QVZ 2 T2             | 2,357,436              | 575   | 8      | 583           | 1,613,356              | 303   | 4             | 307   | 746,956                | 239   | 2      | 241   |          |
| QVZ 2 T4             | 2,356,912              | 608   | 11     | 619           | 1,612,828              | 287   | 3             | 290   | 746,240                | 251   | 3      | 254   |          |
| QVZ 2 T8             | 2,355,432              | 526   | 9      | 535           | 1,611,564              | 285   | 3             | 288   | 744,996                | 117   | 1      | 118   |          |
| QVZ 2 T16            | 2,353,940              | 450   | 15     | 465           | 1,609,956              | 280   | 4             | 284   | 743,492                | 170   | 2      | 172   |          |
| R-Block r=5 encoder  | 790,480                | 150   | 9      | 159           | 790,464                | 101   | 6             | 107   | 790,412                | 44    | 3      | 47    |          |
| R-Block r=5 decoder  | 790,204                | 29    | 2      | 31            | 790,176                | 20    | 2             | 22    | 791,408                | 9     | 2      | 11    |          |
| R-Block r=20 encoder | 791,448                | 107   | 6      | 113           | 792,320                | 71    | 4             | 75    | 600,132                | 31    | 2      | 33    |          |
| R-Block r=20 decoder | 790,152                | 14    | 2      | 16            | 776,352                | 11    | 2             | 13    | 639,236                | 5     | 1      | 6     |          |

Intel Xeon E5-2680 v3 CPU (2.50 GHz); 270 GB RAM

| H12 (Garvan replicate) |                        |        |        |               |                        |       |               |        |                        |       |        |       | Platform |
|------------------------|------------------------|--------|--------|---------------|------------------------|-------|---------------|--------|------------------------|-------|--------|-------|----------|
|                        | Chromosome 3           |        |        | Chromosome 11 |                        |       | Chromosome 20 |        |                        | User  | System | Total |          |
|                        | Peak memory usage [kB] | User   | System | Total         | Peak memory usage [kB] | User  | System        | Total  | Peak memory usage [kB] |       |        |       |          |
| CALQ encoder           | 90,364                 | 13,747 | 1,002  | 14,749        | 90,580                 | 9,408 | 688           | 10,096 | 91,368                 | 4,314 | 247    | 4,561 |          |
| CALQ decoder           | 20,592                 | 2,295  | 44     | 2,339         | 20,584                 | 1,591 | 20            | 1,611  | 21,248                 | 721   | 8      | 729   |          |
| Crumble -1             | 97,708                 | 2,718  | 18     | 2,736         | 200,896                | 1,998 | 14            | 2,012  | 16,256                 | 911   | 8      | 919   |          |
| Crumble -9             | 97,708                 | 2,718  | 18     | 2,736         | 201,396                | 1,897 | 14            | 1,911  | 17,992                 | 825   | 6      | 831   |          |
| DSRC IL8B              | N/A                    | N/A    | N/A    | N/A           | N/A                    | N/A   | N/A           | N/A    | N/A                    | N/A   | N/A    | N/A   |          |
| P-Block p=1 encoder    | 843,460                | 509    | 24     | 533           | 844,292                | 351   | 17            | 368    | 842,856                | 161   | 9      | 170   |          |
| P-Block p=1 decoder    | 790,088                | 89     | 5      | 94            | 791,496                | 62    | 4             | 66     | 790,148                | 30    | 3      | 33    |          |
| P-Block p=4 encoder    | 844,344                | 432    | 19     | 451           | 842,816                | 301   | 14            | 315    | 842,872                | 138   | 8      | 146   |          |
| P-Block p=4 decoder    | 791,836                | 53     | 4      | 57            | 790,128                | 37    | 3             | 40     | 790,120                | 17    | 2      | 19    |          |
| Quartz                 | 26,538,340             | 5,558  | 829    | 6,387         | 26,538,204             | 2,943 | 387           | 3,330  | 26,538,300             | 1,346 | 285    | 1,631 |          |
| QVZ 2 T1               | 11,080,944             | 1,887  | 49     | 1,936         | 7,667,400              | 1,017 | 10            | 1,027  | 3,473,072              | 1,017 | 10     | 1,027 |          |
| QVZ 2 T2               | 11,080,240             | 1,393  | 42     | 1,435         | 7,666,812              | 946   | 17            | 963    | 3,472,220              | 420   | 4      | 424   |          |
| QVZ 2 T4               | 11,079,492             | 1,109  | 41     | 1,150         | 7,666,080              | 766   | 14            | 780    | 3,471,464              | 367   | 4      | 371   |          |
| QVZ 2 T8               | 11,078,884             | 1,136  | 39     | 1,175         | 7,665,444              | 812   | 16            | 828    | 3,471,100              | 382   | 8      | 390   |          |
| QVZ 2 T16              | 11,078,768             | 1,123  | 33     | 1,156         | 7,665,472              | 736   | 17            | 753    | 3,470,828              | 362   | 4      | 366   |          |
| R-Block r=5 encoder    | 791,452                | 569    | 29     | 598           | 790,484                | 377   | 19            | 396    | 790,436                | 176   | 9      | 185   |          |
| R-Block r=5 decoder    | 790,472                | 94     | 7      | 101           | 790,936                | 70    | 6             | 76     | 790,296                | 33    | 3      | 36    |          |
| R-Block r=20 encoder   | 791,616                | 457    | 21     | 478           | 790,424                | 324   | 16            | 340    | 790,276                | 144   | 7      | 151   |          |
| R-Block r=20 decoder   | 791,460                | 53     | 4      | 57            | 790,224                | 38    | 3             | 41     | 790,008                | 18    | 2      | 20    |          |

Intel Xeon E5-2680 v3 CPU (2.50 GHz); 270 GB RAM

Figure 3: Performance measurements results.



Figure 4 shows the peak memory usages of all tools.

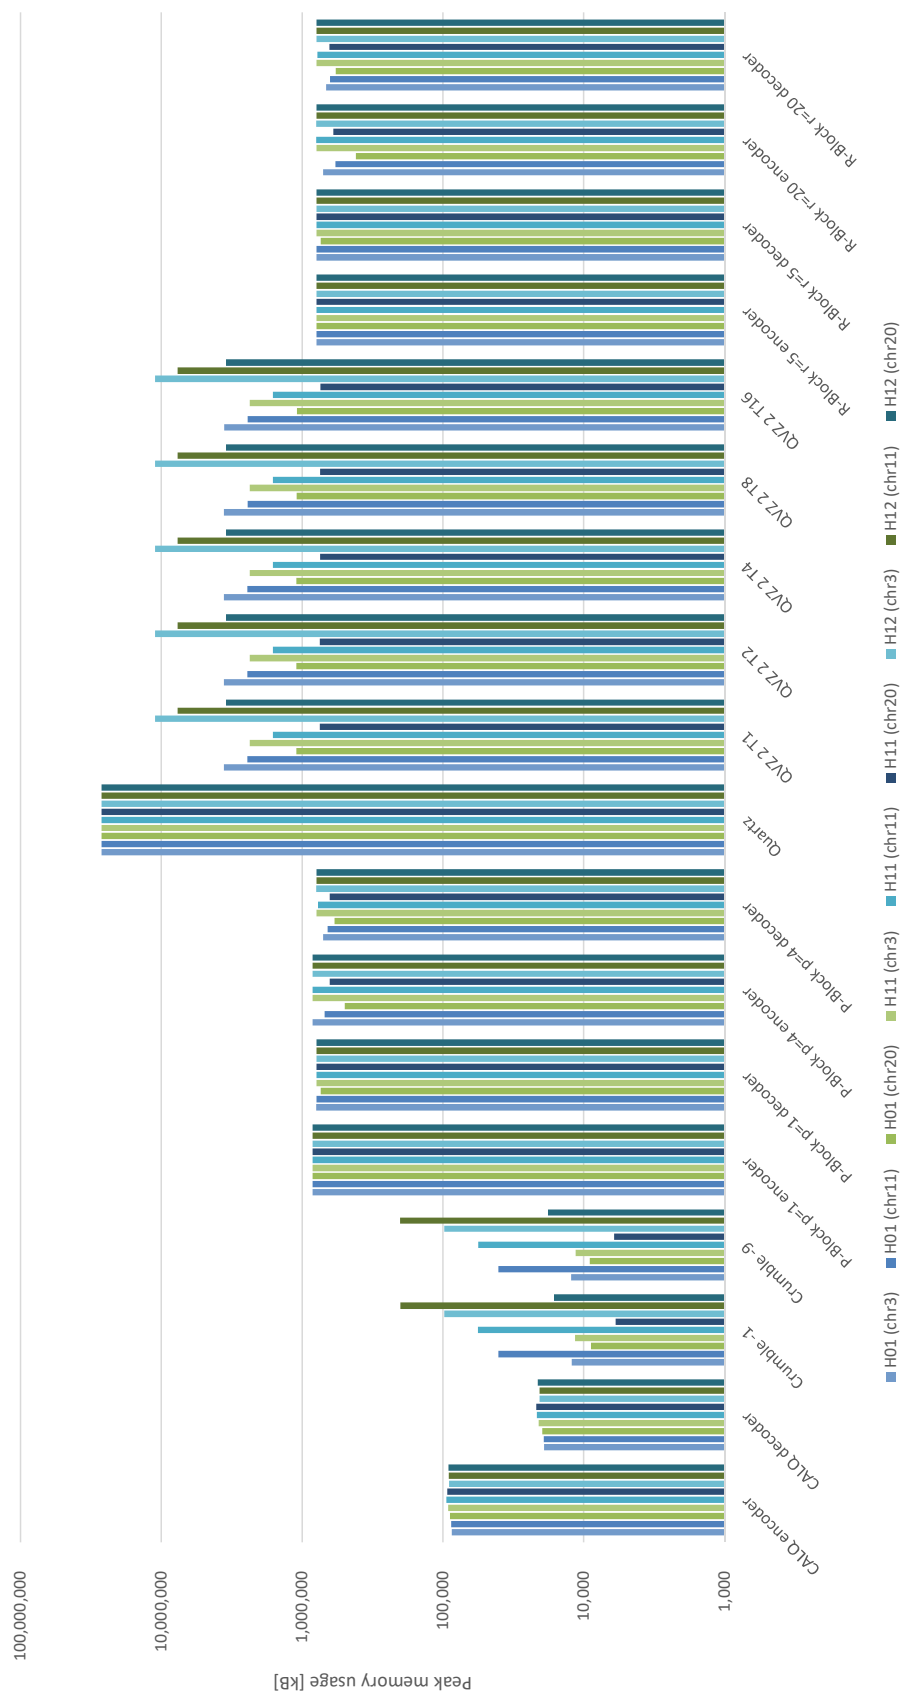

Figure 4: Peak memory usages.

Furthermore, the running times of the evaluated tools are shown in Figure 5.

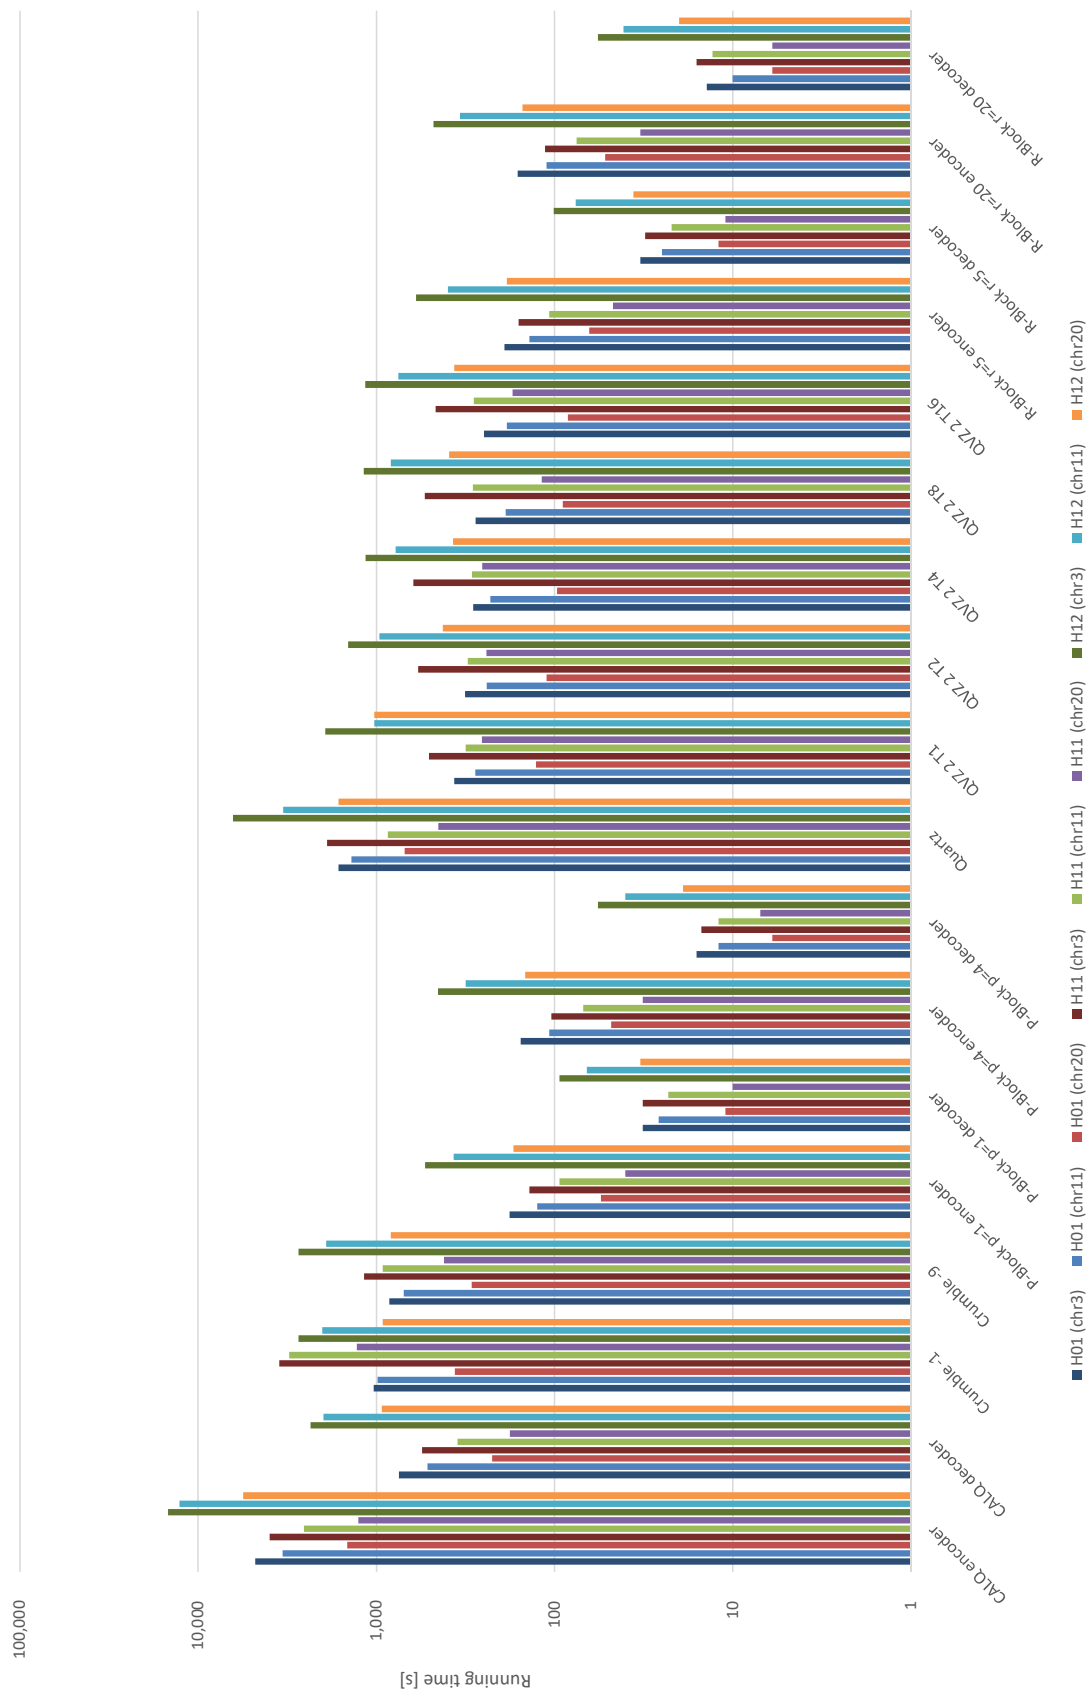

Figure 5: Running times.

## 4 Variant calling pipelines

This section provides information on the specific configurations of the variant calling pipelines used to assess the performance of CALQ and of the previously proposed compression tools. The alignment and preprocessing is common to all pipelines.

Specifically, we used three different pipelines.

- GATK + VQSR: GATK variant calling and SNP extraction with subsequent filtering of variants using GATK Vector Quality Score Recalibration (VQSR) with four different filter values. This specific pipeline was also proposed by the JAhG [Joi16a].
- GATK + hard filtration: GATK variant calling and SNP extraction with the more traditional subsequent hard filtration of variants.
- Platypus: Platypus variant calling as recommended by the authors.

The following tool versions were used.

- Bowtie 2 2.2.5 [LS12]
- Picard 2.4.1
- SAMtools 1.3 (built with HTSlib version 1.3) [LHW+09]
- GATK 3.6 [MHB+10]
- Platypus (latest stable release downloaded from <http://www.well.ox.ac.uk/platypus>) [RPM+14]

To perform the GATK variant calling procedure, the following additional file from the GATK resource bundle (<https://software.broadinstitute.org/gatk/download/bundle>) is needed.

- `dbsnp_138.b37.vcf`

To perform the GATK VQSR procedure and the alignment and preprocessing, the following additional files from the GATK resource bundle (<https://software.broadinstitute.org/gatk/download/bundle>) are needed.

- `Mills_and_1000G_gold_standard.indels.b37.vcf`
- `1000G_phase1.indels.b37.vcf`
- `dbsnp_138.b37.vcf`
- `hapmap_3.3.b37.vcf`
- `1000G_omni2.5.b37.vcf`
- `1000G_phase1.snps.high_confidence.b37.vcf`

For the purpose of this evaluation, we used the GATK resource bundle version 2.8. An overview of the used variant calling pipelines is given in Figure 6.

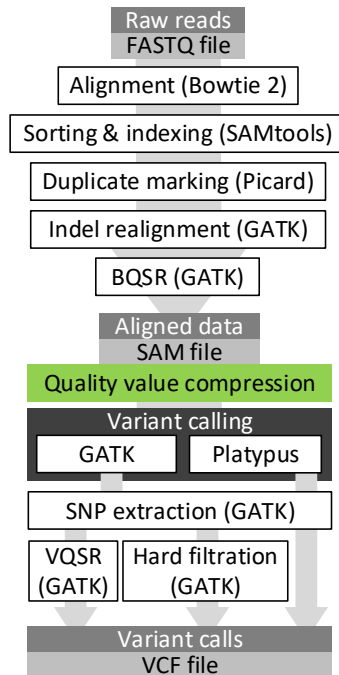

Figure 6: Variant calling pipelines.

## 4.1 Alignment and preprocessing

### 4.1.1 Alignment with Bowtie 2

The first step consists in building the reference indexes. We used the file `human_g1k_v37.fasta` from the GATK resource bundle as reference `ref.fa`.

---

```
$ bowtie2-build ref.fa $idx
```

---

Once completed, the current directory contains new files that all start with `$idx` and end with `.1.bt2`, `.2.bt2`, `.3.bt2`, `.4.bt2`, `.rev.1.bt2`, and `.rev.2.bt2`. These files constitute the index. At this point alignment can take place.

---

```
$ bowtie2 -x $idx -1 reads_1.fastq -2 reads_2.fastq -S aln.sam
```

---

### 4.1.2 Sorting and indexing

We converted the SAM file to the BAM format using SAMtools.

---

```
$ samtools view -bh aln.sam > aln.bam
```

---

Then we sorted and indexed the BAM file.

---

```
$ samtools sort aln.bam > sorted.bam
$ samtools index sorted.bam
```

---

### 4.1.3 Duplicate marking

The duplicates were marked in the BAM file using Picard.

---

```
$ java -jar picard.jar MarkDuplicates \
    I=sorted.bam \
    O=dupmark.bam \
```

---

```
M=metrics.txt \  
ASSUME_SORTED=true
```

---

Subsequently, we used Picard to label the BAM headers.

---

```
$ java -jar picard.jar AddOrReplaceReadGroups \  
  I=dupmark.bam \  
  O=label.bam \  
  RGID=1 \  
  RGLB=Library \  
  RGPL=Illumina \  
  RGPU=PlatformUnit \  
  RGSM=SampleName
```

---

Then we indexed the resulting file.

---

```
$ samtools index label.bam
```

---

#### 4.1.4 Indel realignment

We created the target list of intervals with GATK.

---

```
$ java -jar GenomeAnalysisTK.jar -T RealignerTargetCreator \  
  -R ref.fa \  
  -I label.bam \  
  --known Mills_and_1000G_gold_standard.indels.b37.vcf \  
  -o target_intervals.list
```

---

The following command performs the realignment.

---

```
$ java -jar GenomeAnalysisTK.jar -T IndelRealigner \  
  -R ref.fa \  
  -I label.bam \  
  -targetIntervals target_intervals.list \  
  -o realign.bam
```

---

#### 4.1.5 Base quality score recalibration (BQSR)

A recalibration of the quality values was performed using the following two commands.

---

```
$ java -jar GenomeAnalysisTK.jar -T BaseRecalibrator \  
  -R ref.fa \  
  -I realign.bam \  
  -knownSites dbsnp_138.b37.vcf \  
  -knownSites Mills_and_1000G_gold_standard.indels.b37.vcf \  
  -knownSites 1000G_phase1.indels.b37.vcf \  
  -o recal.data  
  
$ java -jar GenomeAnalysisTK.jar -T PrintReads \  
  -R ref.fa \  
  -I realign.bam \  
  -BQSR recal.data \  
  -o recal.bam
```

---

## 4.2 Variant calling

### 4.2.1 SNP calling with GATK

We consider the tool HaplotypeCaller as the variant caller for the GATK pipeline to call variants on chromosome `$chr`.

---

```
$ java -jar GenomeAnalysisTK.jar -T HaplotypeCaller \  
-R ref.fa \  
-L $chr \  
-I recal.bam \  
--dbsnp dbsnp_138.b37.vcf \  
--genotyping_mode DISCOVERY \  
-stand_emit_conf 10 \  
-stand_call_conf 30 \  
-o gatk_calls.vcf
```

---

Once the calls are made, SNPs extraction was performed using the following command.

---

```
$ java -jar GenomeAnalysisTK.jar -T SelectVariants \  
-R ref.fa \  
-L $chr \  
-V gatk_calls.vcf \  
-selectType SNP \  
-o gatk_snps.vcf
```

---

**4.2.1.1 Variant quality score recalibration (VQSR)** Call filtering was performed using the VQSR command. First, the SNP recalibration model was built where 100.0, 99.9, 99.0 and 90.0 are the thresholds used:

---

```
$ java -jar GenomeAnalysisTK.jar -T VariantRecalibrator \  
-R ref.fa \  
-L $chr \  
-input gatk_snps.vcf \  
-resource:hapmap,known=false,training=true,truth=true,prior=15.0 \  
hapmap_3.3.b37.vcf \  
-resource:omni,known=false,training=true,truth=true,prior=12.0 \  
1000G_omni2.5.b37.vcf \  
-resource:1000G,known=false,training=true,truth=false,prior=10.0 \  
1000G_phase1.snps.high_confidence.b37.vcf \  
-resource:dbsnp,known=true,training=false,truth=false,prior=2.0 \  
dbsnp_138.b37.vcf \  
-an DP -an QD -an FS -an SOR -an MQ -an MQRankSum \  
-an ReadPosRankSum \  
-mode SNP \  
-tranche 100.0 -tranche 99.9 -tranche 99.0 -tranche 90.0 \  
-recalFile gatk_snps.recal \  
-tranchesFile gatk_snps.tranches \  
-rscriptFile gatk_snps.r
```

---

Then the desired level of recalibration was applied. Note that the variable `$recal_level` should be 100.0, 99.9, 99.0, and 90.0.

---

```
$ java -jar GenomeAnalysisTK.jar -T ApplyRecalibration \  
-R ref.fa \  
-L $chr \  
-input gatk_snps.vcf \  
-mode SNP \  
--ts_filter_level $recal_level \  
-recalFile gatk_snps.recal \  
-tranchesFile gatk_snps.tranches \  
-o recal.vcf
```

---

**4.2.1.2 Hard filtration** Hard filtration of variants was performed with the following command as recommended by the GATK authors in <http://gatkforums.broadinstitute.org/gatk/discussion/2806/>.

---

```
$ java -jar GenomeAnalysisTK.jar -T VariantFiltration \  
  -R ref.fa \  
  -L $chr \  
  -V gatk_snps.vcf \  
  --filterExpression "QD < 2.0 || FS > 60.0 || MQ < 40.0 || \  
    MQRankSum < -12.5 || ReadPosRankSum < -8.0" \  
  --filterName "GATK_Recommended" \  
  -o filtered.vcf
```

---

#### 4.2.2 SNP calling with Platypus

SNP calling with Platypus was performed with the following commands.

---

```
$ python Platypus.py callVariants \  
  --bamFiles=recal.bam \  
  --refFile=ref.fa \  
  --regions=$chr \  
  --output=platypus_calls.vcf \  
  --logFileName=log.txt  
$ java -jar GenomeAnalysisTK.jar -T SelectVariants \  
  -R ref.fa \  
  -L $chr \  
  -V platypus_calls.vcf \  
  -selectType SNP \  
  -o platypus_snps.vcf
```

---

#### 4.3 Benchmarking tools

We used the benchmarking tools proposed by the Global Alliance for Genomics and Health (GA4GH). The tools were downloaded from the following locations.

- <https://github.com/ga4gh/benchmarking-tools>
- <https://github.com/Illumina/hap.py>

The benchmarking is mainly based on the haplotype comparison tool hap.py, developed by Illumina. Hap.py requires the following files from the Genome in a Bottle (GIAB) high-confidence variant call set:

- the VCF file containing the “golden reference” (`gt.vcf`),
- the BED file containing the confident regions of the golden reference (`gt.bed`),
- the VCF file generated after running the variant calling pipeline (`input.vcf`),
- the FASTA file containing the reference sequence(s) used for alignment (`ref.fa`).

We used the GIAB high-confidence variant call set version 3.2.2 which was downloaded from <https://www.nist.gov/programs-projects/genome-bottle>. Specifically, we used the following command to run hap.py.

---

```
$ python hap.py gt.vcf input.vcf \  
  -f gt.bed \  
  -o happy_root \  
  -r ref.fa \  
  --roc VQLS0D
```

---

We used the benchmarking tool rep.py from the GA4GH to summarize the output files in an HTML file.

## 5 Variant calling results

The results shown in the main paper are the results of variant calling on the datasets H01 and H11 from Table 2 with the GATK + VQSR pipeline. Here, in addition to the results for the datasets H01 and H11, we show the results for dataset H12. We averaged the Recall and Precision metrics over the chromosomes 3, 11 and 20 and over the four VQSR filter values ( $\theta \in \{90, 99, 99.9, 100\}$ ) which in total yields 6 plots (i.e., 3 data sets  $\times$  2 metrics).

Also in this section, for the GATK + VQSR pipeline, we show a table containing the obtained Recall and Precision for the three chromosomes and the four VQSR filter values separately. In addition, the table shows the obtained F-scores. That is, we show 540 separate Recall, Precision, and F-score values (i.e., 3 data sets  $\times$  3 metrics  $\times$  4 filter values  $\times$  (14+1) tools/configurations, including the results for the uncompressed data).

Furthermore, we show tables containing the Recall, Precision, and F-score results for the GATK + hard filtration pipeline and for the Platypus pipeline.



## 5.1 GATK + VQSR pipeline

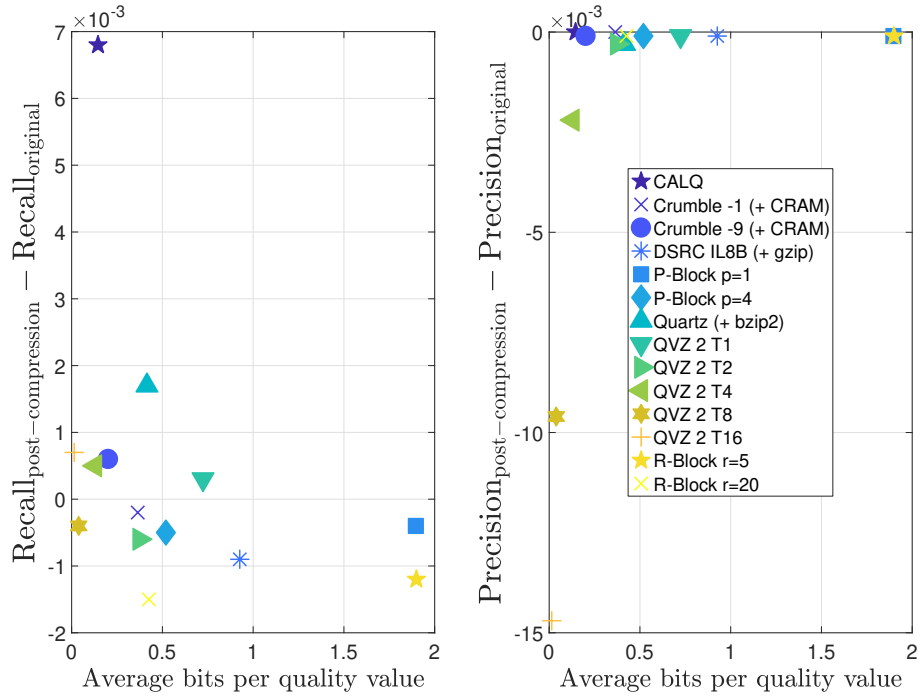

Figure 7: Recall and Precision results for the Illumina HiSeq 2000 data set ERR174324 with a coverage of  $14\times$ . The Recall and Precision metrics were averaged over the four VQSR filtering values as well as over all chromosomes 3, 11 and 20.

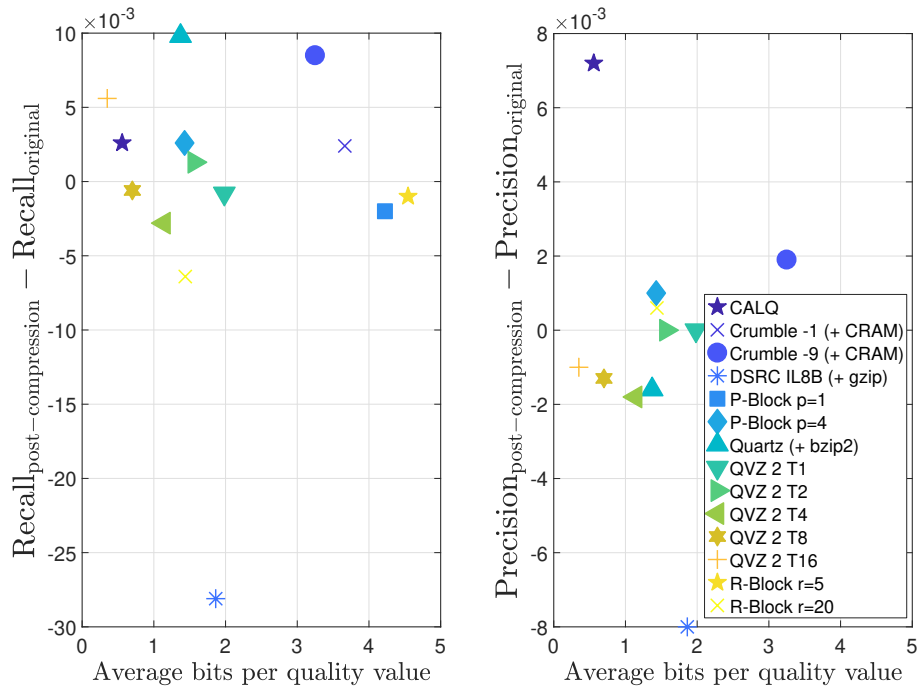

Figure 8: Recall and Precision results for the Ion Torrent data set SRR1238539 with a coverage of  $10\times$ . The Recall and Precision metrics were averaged over the four VQSR filtering values as well as over all chromosomes 3, 11 and 20.

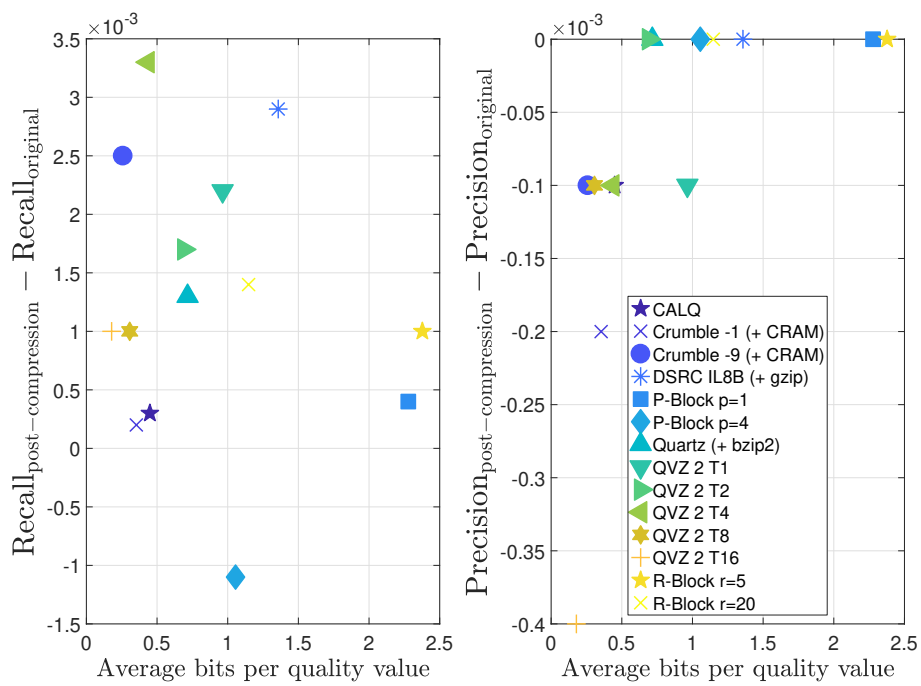

Figure 9: Recall and Precision results for the Illumina HiSeq X data set generated by the Garvan Institute with a coverage of  $49\times$ . The Recall and Precision metrics were averaged over the four VQSR filtering values as well as over all chromosomes 3, 11 and 20.







| H01 (ERR174324)     |                          |         |                                              |         |         |                                      |
|---------------------|--------------------------|---------|----------------------------------------------|---------|---------|--------------------------------------|
|                     | Chromosomes 3, 11 and 20 |         |                                              |         |         | Remarks                              |
|                     | Size [B]                 | Bits/QV | Average differences w.r.t. uncompressed data |         |         |                                      |
|                     |                          |         | R                                            | P       | F       |                                      |
| Uncompressed        | 5,788,156,177            | 8.0000  | 0.0000                                       | 0.0000  | 0.0000  | N/A                                  |
| CALQ 0b74e3d        | 105,155,338              | 0.1453  | 0.0068                                       | 0.0000  | 0.0037  | N/A                                  |
| Crumble -1 (+ CRAM) | 263,454,340              | 0.3641  | -0.0002                                      | 0.0000  | -0.0002 | N/A                                  |
| Crumble -9 (+ CRAM) | 145,696,428              | 0.2014  | 0.0006                                       | -0.0001 | 0.0003  | VQSR failed for chromosomes 3 and 20 |
| DSRC IL8B (+ gzip)  | 670,116,644              | 0.9262  | -0.0009                                      | -0.0001 | -0.0005 | VQSR failed for chromosome 20        |
| P-Block p=1         | 1,371,985,844            | 1.8963  | -0.0004                                      | -0.0001 | -0.0002 | N/A                                  |
| P-Block p=4         | 375,672,492              | 0.5192  | -0.0005                                      | -0.0001 | -0.0002 | N/A                                  |
| Quartz (+ bzip2)    | 300,097,704              | 0.4148  | 0.0017                                       | -0.0003 | 0.0009  | N/A                                  |
| QVZ 2 T1            | 523,587,013              | 0.7237  | 0.0003                                       | -0.0001 | 0.0002  | N/A                                  |
| QVZ 2 T2            | 269,875,362              | 0.3730  | -0.0006                                      | -0.0003 | -0.0004 | N/A                                  |
| QVZ 2 T4            | 93,742,221               | 0.1296  | 0.0005                                       | -0.0022 | -0.0006 | N/A                                  |
| QVZ 2 T8            | 28,039,245               | 0.0388  | -0.0004                                      | -0.0096 | -0.0045 | N/A                                  |
| QVZ 2 T16           | 10,299,097               | 0.0142  | 0.0007                                       | -0.0147 | -0.0063 | N/A                                  |
| R-Block r=5         | 1,374,174,900            | 1.8993  | -0.0012                                      | -0.0001 | -0.0004 | VQSR failed for chromosome 20        |
| R-Block r=20        | 307,751,988              | 0.4254  | -0.0015                                      | -0.0001 | -0.0008 | N/A                                  |

| H11 (SRR1238539)    |                          |         |                                              |         |         |                               |
|---------------------|--------------------------|---------|----------------------------------------------|---------|---------|-------------------------------|
|                     | Chromosomes 3, 11 and 20 |         |                                              |         |         | Remarks                       |
|                     | Size [B]                 | Bits/QV | Average differences w.r.t. uncompressed data |         |         |                               |
|                     |                          |         | R                                            | P       | F       |                               |
| Uncompressed        | 4,098,220,033            | 8.0000  | 0.0000                                       | 0.0000  | 0.0000  | N/A                           |
| CALQ 0b74e3d        | 285,836,297              | 0.5580  | 0.0026                                       | 0.0072  | 0.0041  | N/A                           |
| Crumble -1 (+ CRAM) | 1,876,649,453            | 3.6633  | 0.0024                                       | 0.0003  | 0.0021  | N/A                           |
| Crumble -9 (+ CRAM) | 1,664,575,991            | 3.2494  | 0.0085                                       | 0.0019  | 0.0073  | VQSR failed for chromosome 20 |
| DSRC IL8B (+ gzip)  | 954,158,307              | 1.8626  | -0.0281                                      | -0.0080 | -0.0253 | N/A                           |
| P-Block p=1         | 2,163,257,756            | 4.2228  | -0.0020                                      | 0.0000  | -0.0016 | N/A                           |
| P-Block p=4         | 731,948,828              | 1.4288  | 0.0026                                       | 0.0010  | 0.0024  | N/A                           |
| Quartz (+ bzip2)    | 703,019,460              | 1.3723  | 0.0098                                       | -0.0016 | 0.0074  | N/A                           |
| QVZ 2 T1            | 1,016,017,763            | 1.9833  | -0.0008                                      | 0.0000  | -0.0006 | N/A                           |
| QVZ 2 T2            | 801,652,334              | 1.5649  | 0.0013                                       | 0.0000  | 0.0011  | N/A                           |
| QVZ 2 T4            | 584,378,772              | 1.1407  | -0.0028                                      | -0.0018 | -0.0027 | N/A                           |
| QVZ 2 T8            | 358,730,654              | 0.7003  | -0.0006                                      | -0.0013 | -0.0008 | N/A                           |
| QVZ 2 T16           | 179,463,451              | 0.3503  | 0.0056                                       | -0.0010 | 0.0043  | N/A                           |
| R-Block r=5         | 2,328,454,708            | 4.5453  | -0.0010                                      | 0.0001  | -0.0008 | N/A                           |
| R-Block r=20        | 737,179,436              | 1.4390  | -0.0064                                      | 0.0006  | -0.0051 | N/A                           |

| H12 (Garvan replicate) |                          |         |                                              |         |         |                              |
|------------------------|--------------------------|---------|----------------------------------------------|---------|---------|------------------------------|
|                        | Chromosomes 3, 11 and 20 |         |                                              |         |         | Remarks                      |
|                        | Size [B]                 | Bits/QV | Average differences w.r.t. uncompressed data |         |         |                              |
|                        |                          |         | R                                            | P       | F       |                              |
| Uncompressed           | 19,404,571,275           | 8.0000  | 0.0000                                       | 0.0000  | 0.0000  | N/A                          |
| CALQ 0b74e3d           | 1,089,506,661            | 0.4492  | 0.0003                                       | -0.0001 | 0.0003  | N/A                          |
| Crumble -1 (+ CRAM)    | 858,452,616              | 0.3539  | 0.0002                                       | -0.0002 | -0.0001 | N/A                          |
| Crumble -9 (+ CRAM)    | 626,479,443              | 0.2583  | 0.0025                                       | -0.0001 | 0.0015  | N/A                          |
| DSRC IL8B (+ gzip)     | 3,292,742,011            | 1.3575  | 0.0029                                       | 0.0000  | 0.0018  | N/A                          |
| P-Block p=1            | 5,524,698,820            | 2.2777  | 0.0004                                       | 0.0000  | 0.0003  | VQSR failed for chromosome 3 |
| P-Block p=4            | 2,559,896,988            | 1.0554  | -0.0011                                      | 0.0000  | -0.0007 | N/A                          |
| Quartz (+ bzip2)       | 1,736,545,040            | 0.7159  | 0.0013                                       | 0.0000  | 0.0008  | N/A                          |
| QVZ 2 T1               | 2,337,887,888            | 0.9639  | 0.0022                                       | -0.0001 | 0.0013  | N/A                          |
| QVZ 2 T2               | 1,671,939,362            | 0.6893  | 0.0017                                       | 0.0000  | 0.0010  | N/A                          |
| QVZ 2 T4               | 1,057,508,124            | 0.4360  | 0.0033                                       | -0.0001 | 0.0019  | N/A                          |
| QVZ 2 T8               | 743,537,475              | 0.3065  | 0.0010                                       | -0.0001 | 0.0006  | N/A                          |
| QVZ 2 T16              | 433,127,845              | 0.1786  | 0.0010                                       | -0.0004 | 0.0003  | N/A                          |
| R-Block r=5            | 5,766,377,300            | 2.3773  | 0.0010                                       | 0.0000  | 0.0007  | N/A                          |
| R-Block r=20           | 2,783,441,556            | 1.1475  | 0.0014                                       | 0.0000  | 0.0009  | N/A                          |

Figure 13: Variant calling results averaged over all three chromosomes as well as over all four VQSR filter values for the GATK + VQSR pipeline.



# 5.3 Platypus pipeline

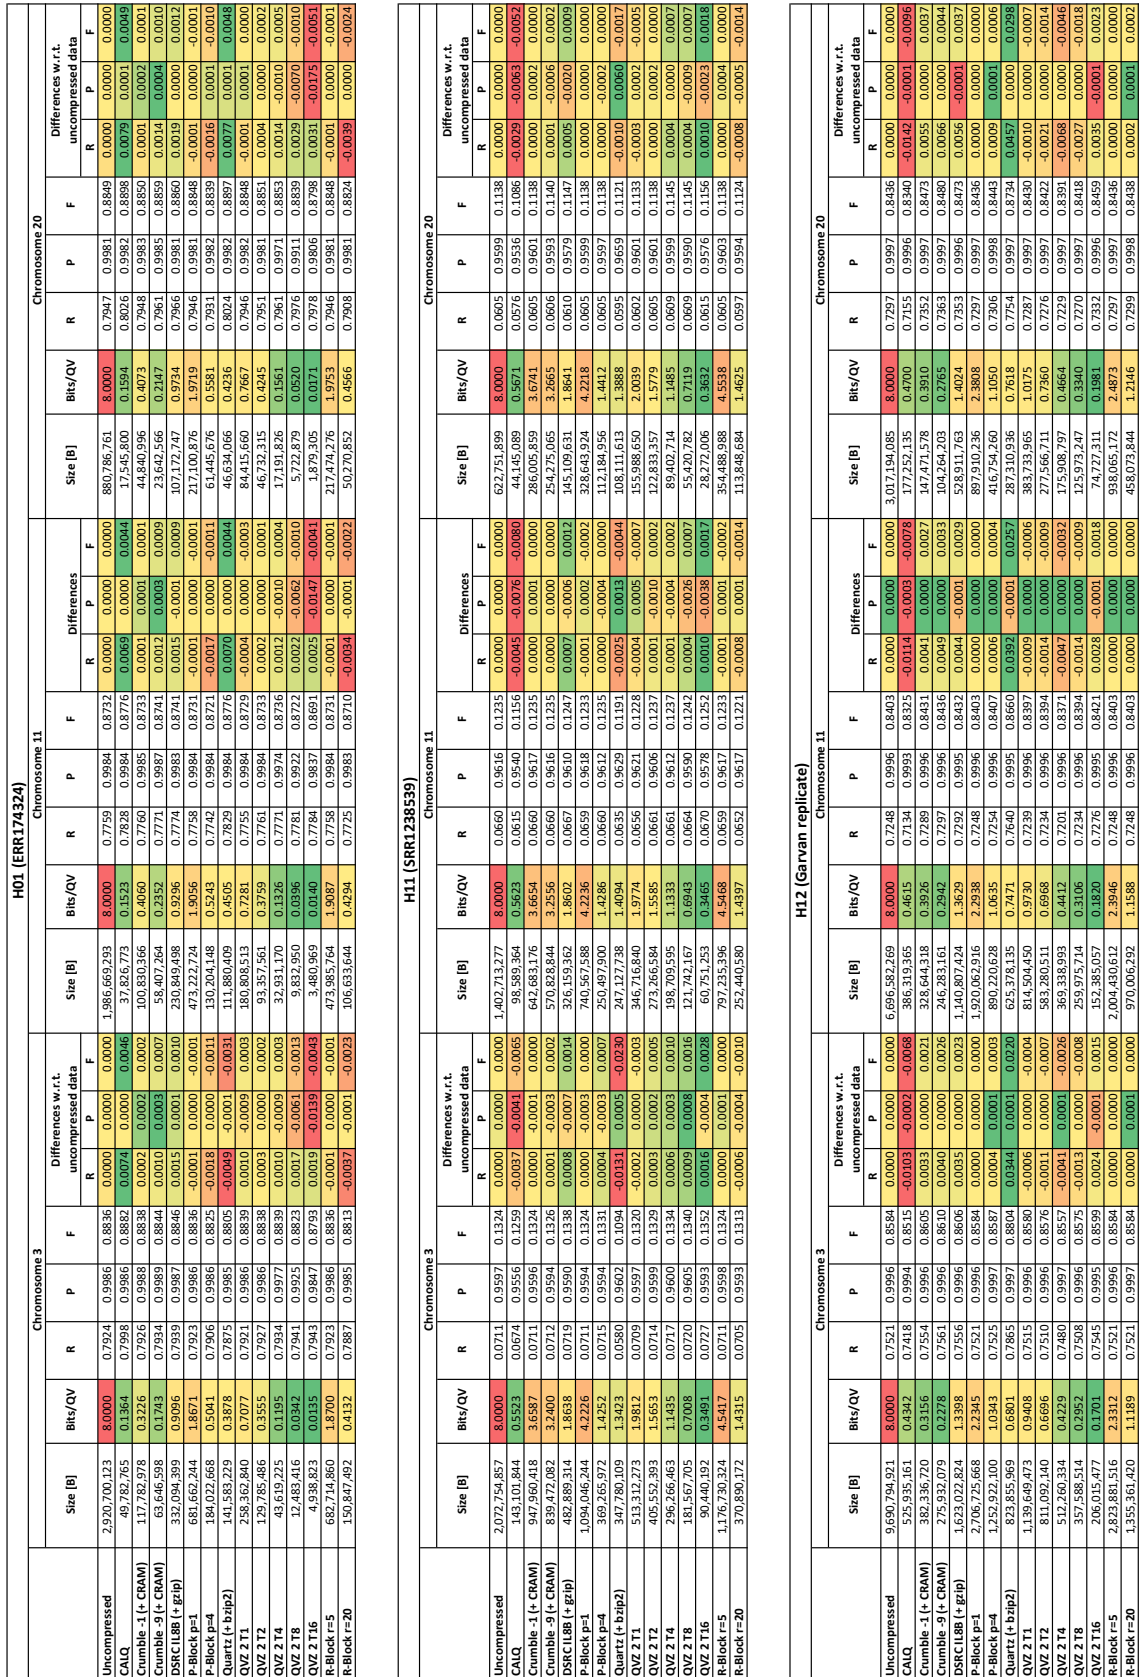

Figure 15: Variant calling results for the Platypus pipeline.



## References

- [Bon14] James K Bonfield. The Scramble conversion tool. *Bioinformatics*, 30(19):2818–2819, 2014.
- [CMT14] Rodrigo Cánovas, Alistair Moffat, and Andrew Turpin. Lossy compression of quality scores in genomic data. *Bioinformatics*, 30(15):2130–2136, 2014.
- [DG11] Sebastian Deorowicz and Szymon Grabowski. Compression of DNA sequence reads in FASTQ format. *Bioinformatics*, 27(6):860–862, 2011.
- [HOW16] Mikel Hernaez, Idoia Ochoa, and Tsachy Weissman. A Cluster-Based Approach to Compression of Quality Scores. In *2016 Data Compression Conference (DCC)*, pages 261–270, 2016.
- [Joi16a] Joint AhG on Genomic Information Compression And Storage. Benchmark framework for lossy compression of sequencing quality values. Technical report, ISO/IEC JTC 1/SC 29/WG 11 (MPEG) and ISO/TC 276/WG 5, Document Number N16525/N119, Chengdu (CN), 2016.
- [Joi16b] Joint AhG on Genomic Information Compression And Storage. Updated database for Evaluation of Genomic Information Compression and Storage. Technical report, ISO/IEC JTC 1/SC 29/WG 11 (MPEG) and ISO/TC 276/WG 5, Document Number N16324/N100, Chengdu (CN), 2016.
- [LHW<sup>+</sup>09] Heng Li, Bob Handsaker, Alec Wysoker, Tim Fennell, Jue Ruan, Nils Homer, Gabor Marth, Goncalo Abecasis, and Richard Durbin. The Sequence Alignment/Map format and SAMtools. *Bioinformatics*, 25(16):2078–2079, 2009.
- [LS12] Ben Langmead and Steven L Salzberg. Fast gapped-read alignment with Bowtie 2. *Nature Methods*, 9(4):357–359, 2012.
- [MHB<sup>+</sup>10] Aaron McKenna, Matthew Hanna, Eric Banks, Andrey Sivachenko, Kristian Cibulskis, Andrew Kernytsky, Kiran Garimella, David Altshuler, Stacey Gabriel, Mark Daly, and Mark A DePristo. The Genome Analysis Toolkit: A MapReduce framework for analyzing next-generation DNA sequencing data. *Genome Research*, 20(9):1297–1303, 2010.
- [RD14] Lukasz Roguski and Sebastian Deorowicz. DSRC 2 - Industry-oriented compression of FASTQ files. *Bioinformatics*, 30(15):2213–2215, 2014.
- [RPM<sup>+</sup>14] Andy Rimmer, Hang Phan, Iain Mathieson, Zamin Iqbal, Stephen R F Twigg, WGS500 Consortium, Andrew O M Wilkie, Gil McVean, and Gerton Lunter. Integrating mapping-, assembly- and haplotype-based approaches for calling variants in clinical sequencing applications. *Nature Genetics*, 46(8):912–918, 2014.
- [YYPB15] Y William Yu, Deniz Yorukoglu, Jian Peng, and Bonnie Berger. Quality score compression improves genotyping accuracy. *Nature Biotechnology*, 33(3):240–243, 2015.
